# Supplementary material for: Hecaton: reliably detecting copy number variation in plant genomes using short read sequencing data
Source: PubMed Central journal article supplement (PMC6836508; doi:10.1186/s12864-019-6153-8), 2019-11-07
Supplement: 12864_2019_6153_MOESM2_ESM.pdf [file 12864_2019_6153_MOESM2_ESM.pdf]

Table S1: **Features used for the random forest model**

| Feature     | Type    | Description                                           |
|-------------|---------|-------------------------------------------------------|
| READ_PAIRS  | Integer | Number of supporting discordantly aligned reads pairs |
| SPLIT_READS | Integer | Number of supporting split reads                      |
| SIZE        | Integer | Size of the event in bp                               |
| DELLY       | Binary  | 1 if event is supported by Delly, 0 otherwise         |
| GRIDSS      | Binary  | 1 if event is supported by GRIDSS, 0 otherwise        |
| LUMPY       | Binary  | 1 if event is supported by LUMPY, 0 otherwise         |
| MANTA       | Binary  | 1 if event is supported by Manta, 0 otherwise         |
| DEL         | Binary  | 1 if event is a deletion, 0 otherwise                 |
| INS         | Binary  | 1 if event is an insertion, 0 otherwise               |
| TANDUP      | Binary  | 1 if event is a tandem duplication, 0 otherwise       |
| DISDUP      | Binary  | 1 if event is a dispersed duplication, 0 otherwise    |

Table S2: **Description of the used datasets**

| Sample                                 | Platform | Accession number | Avg. read length | Number of bases |
|----------------------------------------|----------|------------------|------------------|-----------------|
| <i>A. thaliana</i> Col-0-Cvi-0         | Illumina | SRX1865253       | 2 × 249 bp       | 8.1 Gb          |
| <i>A. thaliana</i> Col-0-Cvi-0         | PacBio   | SRX1715706       | 5.6 kb           | 15.7 Gb         |
| <i>O. sativa</i> Suijing18             | Illumina | SRR5880534       | 2 × 150 bp       | 23.6 Gb         |
| <i>O. sativa</i> Suijing18             | PacBio   | SRR5877285       | 8.5 kb           | 26.4 Gb         |
| <i>A. thaliana</i> Ler                 | Illumina | SRR3166543       | 2 × 100 bp       | 20.8 Gb         |
| <i>A. thaliana</i> Ler                 | PacBio   | SRX533607        | 4.8 kb           | 36.1 Gb         |
| <i>Z. mays</i> ssp. <i>mays</i> L. B73 | Illumina | SRR2960981       | 2 × 250 bp       | 209.8 Gb        |
| <i>Z. mays</i> ssp. <i>mays</i> L. B73 | PacBio   | SRX1472849       | 8.1 kb           | 279.3 Gb        |
| <i>S. lycopersicum</i> PI158760        | Illumina | ERR418074        | 2 × 100 bp       | 35.9 Gb         |
| <i>S. lycopersicum</i> LA2706          | Illumina | ERR418039        | 2 × 100 bp       | 31.4 Gb         |
| <i>S. lycopersicum</i> TR00003         | Illumina | ERR418051        | 2 × 100 bp       | 33.3 Gb         |
| <i>S. lycopersicum</i> LA4451          | Illumina | ERR418065        | 2 × 100 bp       | 29.1 Gb         |
| <i>S. arcanum</i> LA2157               | Illumina | ERR418092        | 2 × 100 bp       | 32.0 Gb         |
| <i>S. habrochaites</i> LYC4            | Illumina | ERR418105        | 2 × 100 bp       | 31.8 Gb         |
| <i>S. pennellii</i> LA0716             | Illumina | ERR418107        | 2 × 100 bp       | 24.9 Gb         |

Table S3: **Number of events called from B73 data that could not be validated by VaPoR**

| Tool        | Number of events | % of total |
|-------------|------------------|------------|
| Delly       | 18074            | 44.41      |
| GRIDSS      | 43006            | 48.45      |
| LUMPY       | 7635             | 24.08      |
| Manta       | 6957             | 23.74      |
| MetaSV      | 35234            | 28.56      |
| Survivor    | 2658             | 32.22      |
| Parliament2 | 12869            | 34.12      |
| Hecaton     | 54322            | 51.13      |

Table S4: **Number of events simulated per size interval**

| Size interval | Number of events |
|---------------|------------------|
| 100-200 bp    | 10               |
| 200-500 bp    | 10               |
| 500-1000 bp   | 10               |
| 1-2 kb        | 10               |
| 2-5 kb        | 10               |
| 5-10 kb       | 5                |
| 10-20 kb      | 5                |
| 20-50 kb      | 3                |
| 50-100 kb     | 3                |
